# Supplementary material for: Validation of an Enzyme Immunoassay to Measure Faecal Glucocorticoid Metabolites in Common Brushtail Possums (Trichosurus vulpecula) to Evaluate Responses to Rehabilitation
Source: MDPI journal article supplement (doi:10.3390/ani12131627), 2022-06-24
Supplement: s1 [file s1]

**Table S2.** Number of events associated with a faecal glucocorticoid metabolite (FGM) response (indicated by a peak in FGM above the baseline threshold within five days of a recorded stress event) or no FGM response for brushtail possums ( $n=20$ ) in various length of rehabilitation, sex, and age categories.

| <b>Possum description</b>              | <b>FGM response</b> | <b>No FGM response</b> | <b>Total events</b> |
|----------------------------------------|---------------------|------------------------|---------------------|
| Short-term, female, adult ( $n=2$ )    | 2                   | 0                      | 2                   |
| Long-term, female, adult ( $n=5$ )     | 5                   | 6                      | 11                  |
| Long-term, male, adult ( $n = 1$ )     | 0                   | 6                      | 6                   |
| Long-term, female, sub-adult ( $n=2$ ) | 3                   | 4                      | 7                   |
| Long-term, unknown sub-adult ( $n=1$ ) | 2                   | 3                      | 5                   |
| Orphan, female, juvenile ( $n=5$ )     | 1                   | 3                      | 4                   |
| Orphan, male juvenile ( $n=4$ )        | 7                   | 4                      | 11                  |
