# Supplementary material for: Validation of an Enzyme Immunoassay to Measure Faecal Glucocorticoid Metabolites in Common Brushtail Possums (Trichosurus vulpecula) to Evaluate Responses to Rehabilitation
Source: MDPI journal article supplement (doi:10.3390/ani12131627), 2022-06-24
Supplement: s1 [file s1]

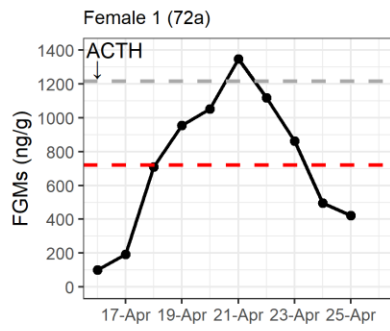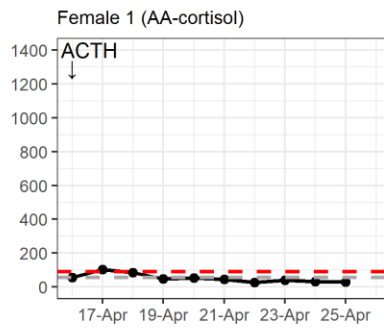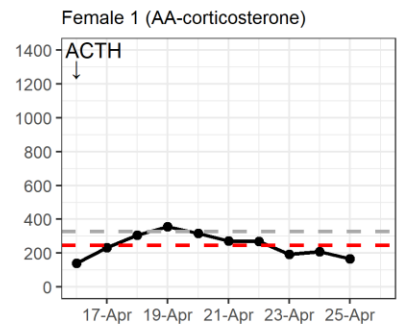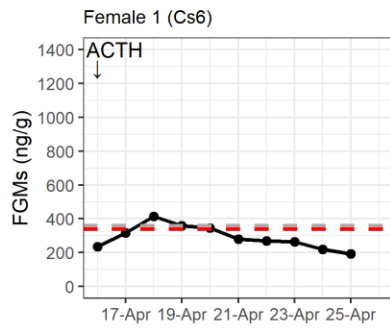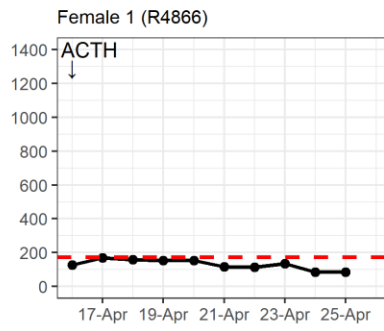

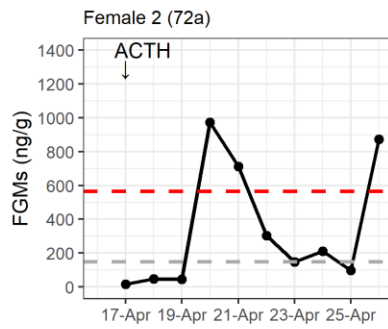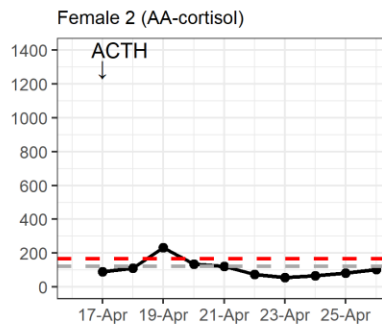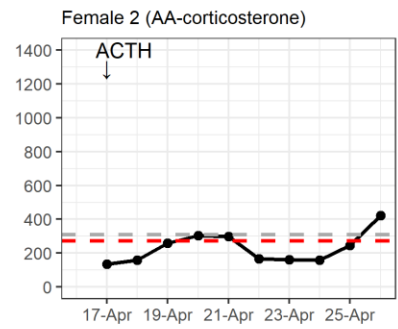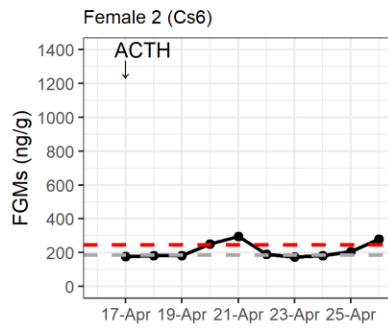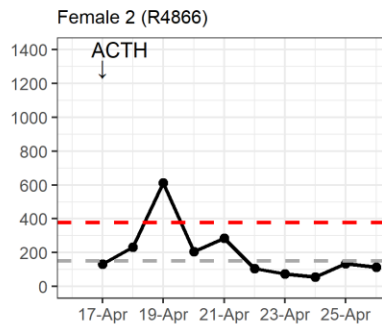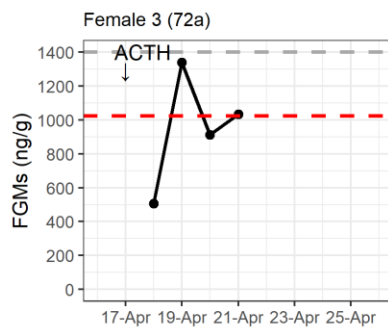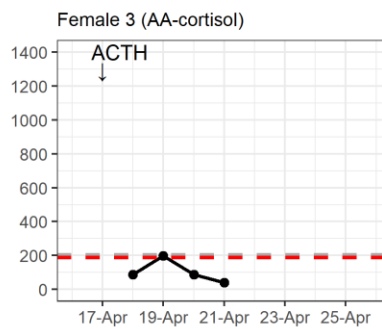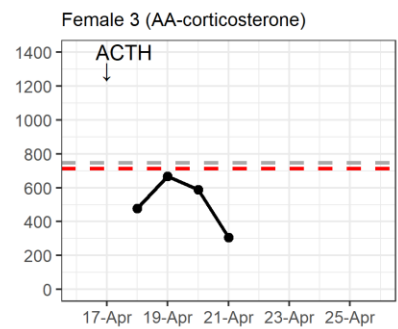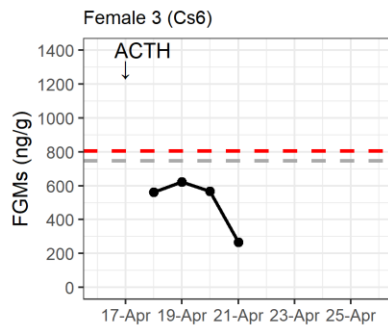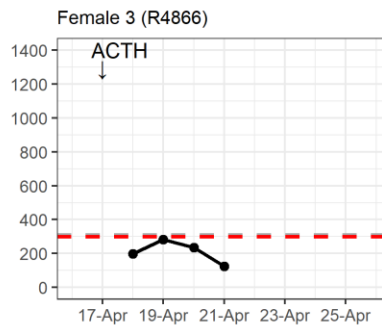

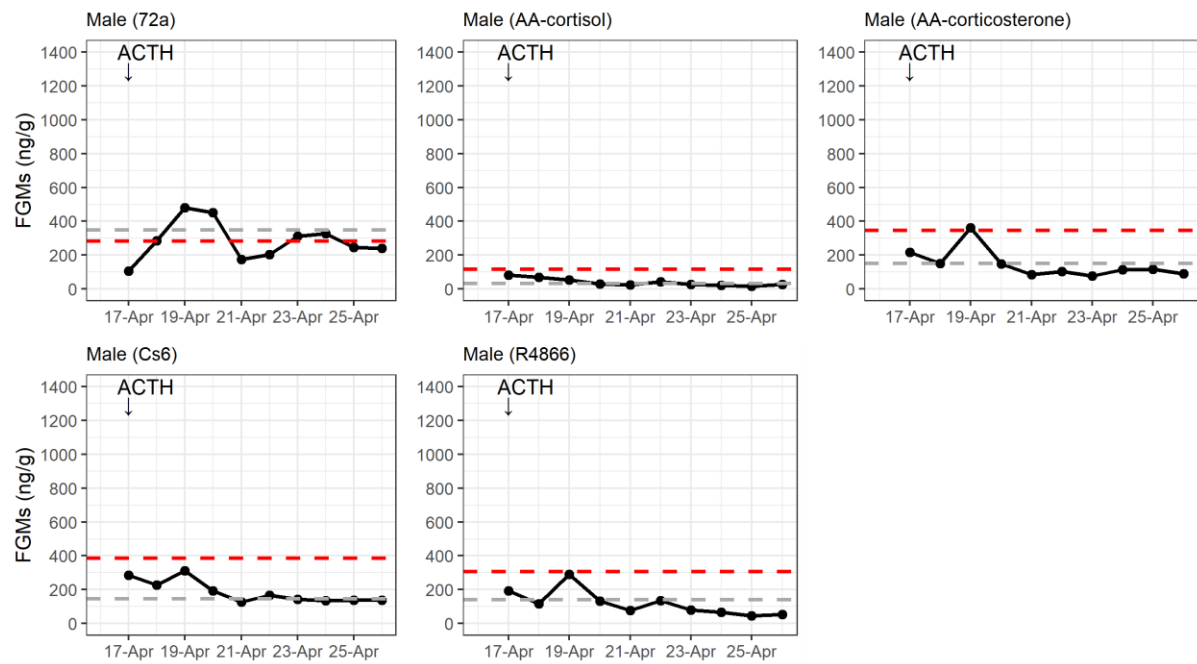

**Figure S1.** Faecal glucocorticoid metabolite (FGM) concentrations (ng/g) over 9 days for Female 1, Female 2, Female 3 and Male used in the ACTH challenge. Results depict FGM concentrations as detected by the enzyme immunoassays 72a, AA-cortisol, AA-corticosterone, Cs6 and R4866. Horizontal dotted lines represent the baseline threshold for the individual as calculated by the iterative baseline method (light grey) and the first sample plus 1.5 SD (red; the method used for validation analysis to detect biologically valid FGM peaks), and time of ACTH administration is indicated by the downward arrow.
