# Supplementary material for: Validation of an Enzyme Immunoassay to Measure Faecal Glucocorticoid Metabolites in Common Brushtail Possums (Trichosurus vulpecula) to Evaluate Responses to Rehabilitation
Source: MDPI journal article supplement (doi:10.3390/ani12131627), 2022-06-24
Supplement: s1 [file s1]

**Table S1.** Summary statistics for possum (n = 20) faecal glucocorticoid metabolite (FGM) concentrations (ng/g), iterative baseline and response to potential stress events (E = Enter rehabilitation; Es = escaped cage; C = No cover; NC = New cage; NP = New possum; BR = Back rider; H = Handling; S = Separated; I = Injection; OM = Oral medication).

| Animal     | Type       | Sex     | Age       | Samples (n) | Mean FGM (ng/g) | Median FGM (ng/g) | S.D. | S.E.M. | CV % | Range      | Baseline threshold | Mean baseline | Mean peak | Response to events              |
|------------|------------|---------|-----------|-------------|-----------------|-------------------|------|--------|------|------------|--------------------|---------------|-----------|---------------------------------|
| 1845       | Long-term  | Female  | Adult     | 12          | 428             | 421               | 169  | 49     | 40   | 174 - 806  | 583                | 394           | 806       | ✓: I<br>✗: E, I, I              |
| 5862       | Long-term  | Female  | Adult     | 16          | 697             | 662               | 339  | 85     | 49   | 272 - 1638 | 928                | 605           | 1342      | ✓:<br>✗: E                      |
| 8295       | Long-term  | Female  | Adult     | 16          | 792             | 563               | 507  | 127    | 64   | 268 - 1991 | 590                | 429           | 1260      | ✓: E, Es, NC, daily OMx15<br>✗: |
| 3215       | Long-term  | Male    | Adult     | 12          | 426             | 425               | 99   | 29     | 23   | 309 - 698  | 480                | 401           | 698       | ✓:<br>✗: E, I, I, I, I          |
| PossumF3   | Short-term | Female  | Adult     | 7           | 1067            | 993               | 318  | 120    | 30   | 631 - 1427 | 1545               | 1067          |           | ✓: E<br>✗:                      |
| PossumF4   | Short-term | Female  | Adult     | 7           | 1500            | 794               | 1652 | 625    | 110  | 281 - 4649 | 1067               | 592           | 3770      | ✓: E<br>✗:                      |
| Meg        | Long-term  | Female  | Adult     | 14          | 984             | 967               | 339  | 91     | 35   | 557 - 1727 | 1172               | 850           | 1477      | ✓:<br>✗: E                      |
| PossumF2   | Long-term  | Female  | Adult     | 12          | 567             | 445               | 358  | 103    | 63   | 198 - 1380 | 518                | 354           | 993       | ✓: E<br>✗:                      |
| Bligh      | Long-term  | Female  | Sub-adult | 8           | 2358            | 838               | 3994 | 1412   | 169  | 125 - 3119 | 437                | 236           | 4480      | ✓:<br>✗: E, OM, OM              |
| Mrs Turner | Long-term  | Female  | Sub-adult | 8           | 1477            | 1256              | 1189 | 420    | 81   | 238 - 3303 | 1737               | 890           | 3240      | ✓: E, I, NC<br>✗: I             |
| Exderm     | Long-term  | Unknown | Sub-adult | 13          | 361             | 335               | 183  | 51     | 51   | 107 - 643  | 369                | 235           | 562       | ✓: I, I, NC<br>✗: E, I          |

|               |        |        |          |    |      |      |      |     |     |               |      |      |      |                           |
|---------------|--------|--------|----------|----|------|------|------|-----|-----|---------------|------|------|------|---------------------------|
| Big Ears      | Orphan | Female | Juvenile | 16 | 575  | 382  | 615  | 154 | 107 | 71 -<br>2340  | 106  | 87   | 738  | ✓: E<br>✗: NC             |
| Ginger        | Orphan | Female | Juvenile | 8  | 138  | 138  | 63   | 22  | 45  | 59 -<br>263   | 181  | 121  | 263  | ✓:<br>✗: E                |
| mas           | Orphan | Female | Juvenile | 10 | 431  | 466  | 353  | 112 | 82  | 43 -<br>832   | 961  | 431  |      | ✓:<br>✗: E                |
| Sore tail     | Orphan | Female | Juvenile | 9  | 2266 | 1918 | 1697 | 566 | 75  | 135 -<br>5105 | 2409 | 1247 | 4304 | N/A                       |
| Velvet        | Orphan | Female | Juvenile | 7  | 538  | 388  | 432  | 163 | 80  | 179 -<br>1269 | 447  | 293  | 1152 | N/A                       |
| Ed            | Orphan | Male   | Juvenile | 11 | 485  | 226  | 631  | 190 | 130 | 62 -<br>2043  | 231  | 138  | 903  | ✓: E, H, H,<br>S<br>✗: NP |
| Elliot        | Orphan | Male   | Juvenile | 12 | 197  | 90   | 306  | 88  | 156 | 14 -<br>1112  | 100  | 53   | 398  | ✓: NC, NP<br>✗: BR, S     |
| scr           | Orphan | Male   | Juvenile | 10 | 382  | 461  | 237  | 75  | 62  | 83 -<br>676   | 737  | 382  |      | ✓:<br>✗: E                |
| Sookie<br>Boy | Orphan | Male   | Juvenile | 13 | 661  | 333  | 622  | 173 | 94  | 110 -<br>2287 | 354  | 221  | 1174 | ✓: C<br>✗:                |
